# Supplementary material for: Systematic Review of Sleep Characteristics in Myalgic Encephalomyelitis/Chronic Fatigue Syndrome
Source: MDPI journal article supplement (doi:10.3390/healthcare9050568), 2021-05-11
Supplement: s1 [file s1]

Table S2. Study and Patient Characteristics

| Author & year                  | Dx                         | Study design                           | Subjects |    | Age (years, mean ± SD)             |                                     | Sex, female (%) |      | BMI (kg m <sup>-2</sup> , mean ± SD) |                                      | Total sleep duration (min ± SD) |                | Illness duration (years) | Method of analysis |
|--------------------------------|----------------------------|----------------------------------------|----------|----|------------------------------------|-------------------------------------|-----------------|------|--------------------------------------|--------------------------------------|---------------------------------|----------------|--------------------------|--------------------|
|                                |                            |                                        | ME/CFS   | HC | ME/CFS                             | HC                                  | ME/CFS          | HC   | ME/CFS                               | HC                                   | ME/CFS                          | HC             |                          |                    |
| Armitage et al 2009            | Fukuda (1994)              | Prospective Observational twin study   | 13       | 13 | 45.4 ± 10.0                        | NR                                  | 100%            | NR   | 30.1                                 | 29.7                                 | 395.9 ± 53.4                    | 403.9 ±35.8    | 9.2                      | PSG                |
| Ball et al 2004                | Fukuda (1994)              | Prospective Observational twin study   | 22       | 22 | 41.4                               | NR                                  | 90.9%           | NR   | NR                                   | NR                                   | 376.2 ± 43.1                    | 383.1 ± 61.1   | 7.0                      | PSG                |
| Bileviciute-Ljungar et al 2020 | Fukuda (1994) & CCC (2003) | Prospective Observational case-control | 23       | 30 | 43 ± 12.0                          | 45 ± 12.0                           | 78.3%           | 70%  | 24 ± 3.0                             | NR                                   | NR                              | NR             | NR                       | PSG                |
| Decker et al 2009              | Fukuda (1994)              | Prospective Observational case-control | 35       | 40 | male 47.0 ± 0.7, female 50.9 ± 9.1 | Male 48.0 ± 10.9, female 50.8 ± 8.1 | 85.7%           | 90%  | male 28.2 ± 5.4, female 28.8 ± 4.1   | Male: 29.5 ± 5.7, female: 29.4 ± 8.1 | NR                              | NR             | >5                       | PSG MSLT           |
| Gotts et al 2016               | Fukuda (1994)              | Prospective Observational case-control | 19       | 22 | 44.63 ± 9.74                       | 25.18 ± 5.86                        | 73.7%           | 50%  | 26.09 ± 3.89                         | 25.18 ± 3.57                         | 442.39 ± 85.85                  | 430.43 ± 30.08 | NR                       | PSG                |
| Kishi et al 2008               | Fukuda (1994)              | Prospective Observational case-control | 22       | 22 | 42 ± 8.0                           | 38 ± 8                              | 100%            | 100% | NR                                   | NR                                   | NR                              | NR             | NR                       | PSG                |
| Le Bon et al 2008              | Fukuda (1994)              | Prospective Observational case-control | 28       | 27 | 33.2 ± 8.7                         | 37.4 ± 5.6                          | 89.3%           | 37%  | 23.2 ± 3.2                           | 23.1 ± 4.1                           | 364.9 ± 60.4                    | 400.5 ±37.1    | NR                       | PSG                |
| Le Bon et al 2012              | Fukuda (1994)              | Prospective Observational case-control | 10       | 10 | 30.7 ± 8.0                         | 32.2 ± 9.8                          | 100%            | 100% | 22.9 ± 4.3                           | 21.5 ± 1.9                           | 455.6 ± 54.7                    | 458.5 ± 47.2   | NR                       | PSG                |

|                        |               |                                         |    |    |             |              |        |       |             |             |               |               |     |          |
|------------------------|---------------|-----------------------------------------|----|----|-------------|--------------|--------|-------|-------------|-------------|---------------|---------------|-----|----------|
| Majer et al 2007       | Fukuda (1994) | Prospective Observational case-control  | 43 | 43 | 50.3        | 50.5         | 85.7%  | 90%   | 28.7        | 29.2        | 400.3         | 407.9         | NR  | PSG MSLT |
| Neu et al 2007         | Fukuda (1994) | Prospective Observational case-control  | 28 | 12 | 34.2 ± 9.2  | 32.3 ± 9.6   | 100%   | 100%  | 23.1 ± 4.1  | 21.3 ± 2.0  | 433.18 ± 71.8 | 406.18 ± 32.5 | NR  | PSG      |
| Neu et al 2008         | Fukuda (1994) | Prospective Observational case-control  | 16 | 12 | 32.8        | 32.2         | 100%   | 100%  | 23.1 ± 4.3  | 21.3 ± 1.9  | NR            | NR            | NR  | PSG MSLT |
| Neu et al 2014A        | Fukuda (1994) | Prospective Observational case-control  | 52 | 25 | 44.8 ± 1.9  | 40.46 ± 2.4  | 88.5%  | 72%   | 24.5 ± 0.9  | 24.71 ± 1.1 | 358.00 ± 11.3 | 386.62 ± 13.8 | NR  | PSG      |
| Neu et al 2014B        | Fukuda (1994) | Prospective Observational case-control  | 15 | 14 | 35.13 ± 4.8 | 31.50 ± 8.1  | 81.25% | 71.4% | 24.09 ± 3.4 | 22.03 ± 1.9 | 416.36 ± 88.1 | 398.96 ± 57.7 | NR  | PSG MSLT |
| Neu et al 2015         | Fukuda (1994) | Prospective Observational case-control  | 30 | 22 | 44.36 ± 9.7 | 38.45 ± 14.2 | 86.7%  | 72.7% | 24.55 ± 4.9 | 23.90 ± 4.8 | 387.32 ± 40.7 | 389.23 ± 49.8 | NR  | PSG      |
| Reeves et al 2006      | Fukuda (1994) | Prospective Observational case-control  | 43 | 43 | 50.6        | 50.3         | 83.7%  | 88.4% | 29.4        | 29.3        | 400.3         | 407.9         | 7.3 | PSG MSLT |
| Sharpley 1997          | Fukuda (1994) | Prospective Observational case- control | 20 | 20 | NR          | NR           | 50%    | 50%   | NR          | NR          | 410 ± 14.2    | 409 ± 12.9    | 1.5 | PSG      |
| Togo <i>et al</i> 2008 | Fukuda (1994) | Prospective Observational case- control | 53 | 42 | 39 ± 8      | 38 ± 8       | 60.4%  | 71.4% | 24.9 ± 5.2) | 24.4 ± 4.8  | 385 ± 39      | 351 ± 54      | NR  | PSG      |
| Togo and Natelson 2013 | Fukuda (1994) | Prospective Observational case- control | 18 | 19 | 39 ± 8.0    | 37 ± 9       | 100%   | 100%  | 22.9 ± 3.3  | 25.8 ± 6.5  | 352 ± 55      | 391 ± 38      | NR  | PSG      |
| Watson et al 2003      | Fukuda (1994) | Prospective Observational twin study    | 22 | 22 | 41.4        | NR           | 90.9%  | NR    | NR          | NR          | 378           | 378           | 7.0 | PSG      |
| Watson et al 2004      | Fukuda (1994) | Prospective Observational twin study    | 20 | 20 | 41          | NR           | 90%    | NR    | NR          | NR          | NR            | NR            | 7.0 | PSG MSLT |

Abbreviations: BMI, Body Mass Index; CCC, Canadian Consensus Criteria; Dx, Diagnostic Criteria; HC, healthy control; ME/CFS, Myalgic Encephalomyelitis/ Chronic Fatigue Syndrome; MSLT, Multiple Sleep Latency Testing; NR, Not Recorded; PSG, Polysomnography; SD, Standard Deviation
