# Supplementary material for: Systematic Review of Sleep Characteristics in Myalgic Encephalomyelitis/Chronic Fatigue Syndrome
Source: MDPI journal article supplement (doi:10.3390/healthcare9050568), 2021-05-11
Supplement: s1 [file s1]

**Table S1.** Search code

| Database                           | Code                                                                                                                                                                                                                                                                                                                                                                                                                                                                                                                                                                                                                                                                                                                                                                                                                                                                                                                                                                                                                                                                                                                                                                                                               |
|------------------------------------|--------------------------------------------------------------------------------------------------------------------------------------------------------------------------------------------------------------------------------------------------------------------------------------------------------------------------------------------------------------------------------------------------------------------------------------------------------------------------------------------------------------------------------------------------------------------------------------------------------------------------------------------------------------------------------------------------------------------------------------------------------------------------------------------------------------------------------------------------------------------------------------------------------------------------------------------------------------------------------------------------------------------------------------------------------------------------------------------------------------------------------------------------------------------------------------------------------------------|
| Pubmed                             | (("Fatigue Syndrome, Chronic"[Mesh])) AND<br>(("Polysomnography"[Mesh]) OR<br>("Polysomnograph*") OR ("Multiple Sleep<br>Latency Test"))                                                                                                                                                                                                                                                                                                                                                                                                                                                                                                                                                                                                                                                                                                                                                                                                                                                                                                                                                                                                                                                                           |
| Medline, Embase and Web of Science | (( "Chronic Fatigue Syndrome") OR ( "Myalgic<br>Encephalomyelitis") OR ("Encephalomyelitis,<br>Myalgic") OR ("Chronic Fatigue Syndromes")<br>OR ("Fatigue Syndromes, Chronic") OR<br>("Chronic Fatigue-Fibromyalgia Syndrome") OR<br>("Chronic Fatigue Fibromyalgia Syndrome") OR<br>("Chronic Fatigue Fibromyalgia Syndromes")<br>OR ("Fatigue-Fibromyalgia Syndrome, Chronic")<br>OR ("Fatigue-Fibromyalgia Syndromes,<br>Chronic") OR ("Postviral Fatigue Syndrome")<br>OR ("Infectious Mononucleosis-Like Syndrome,<br>Chronic") OR ("Infectious Mononucleosis Like<br>Syndrome, Chronic") OR ("Royal Free Disease")<br>OR ("Chronic Fatigue and Immune Dysfunction<br>Syndrome") OR ("Chronic Fatigue Disorder")<br>OR ("Chronic Fatigue Disorders") OR ("Fatigue<br>Disorder, Chronic") OR ("Fatigue Disorders,<br>Chronic") OR ( "systemic exertion intolerance" )<br>OR ("Fatigue Syndrome, Postviral") OR<br>("Fatigue Syndromes, Postviral") OR ("Postviral<br>Fatigue Syndromes")) AND<br>(("Polysomnography") OR<br>("Polysomnographies") OR ("Monitoring, Sleep")<br>OR ("Sleep Monitoring") OR ("Somnography")<br>OR ("Somnographies") OR ("Polysomnograph*")<br>OR ("Multiple Sleep Latency Test")) |
