# Supplementary material for: Systematic Review of Sleep Characteristics in Myalgic Encephalomyelitis/Chronic Fatigue Syndrome
Source: MDPI journal article supplement (doi:10.3390/healthcare9050568), 2021-05-11
Supplement: s1 [file s1]

**Table S3.** Summary of primary outcome measures

| Author (date)                             | Technique   | Findings                                                                                                                                                                                                                                                                                                                                                                                                                                                          |
|-------------------------------------------|-------------|-------------------------------------------------------------------------------------------------------------------------------------------------------------------------------------------------------------------------------------------------------------------------------------------------------------------------------------------------------------------------------------------------------------------------------------------------------------------|
| Armitage <i>et al.</i> (2009)             | PSG         | No significant differences in spectral power in any frequency band including REM latency, delta-wave, fast frequency beta or alpha power were found in the twin with ME/CFS compared to the healthy twin. There, however, were significant differences in sleep stage main effect ( $p < 0.001$ ), EEG frequency band main effect ( $p < 0.001$ ) and sleep stage by frequency band interaction ( $p < 0.0001$ ) in ME/CFS patients compared to the healthy twin. |
| Ball <i>et al.</i> (2004)                 | PSG         | Significantly increased stage 3 ( $p \leq 0.05$ ) and REM sleep were found in ME/CFS patients compared to their healthy twin. ME/CFS patients also showed higher AHI ( $p \leq 0.05$ ) and apnoea hypopnea arousal index ( $p \leq 0.05$ ) values compared to the healthy twin. No significant differences were observed in sleep architecture including sleep latency, REM latency and total sleep time.                                                         |
| Bileviciute-Ljungar <i>et al.</i> (2020). | PSG         | All ME/CFS patients had reduced total sleep time. Higher sleep latency and number of awakenings was found in most patients (78% and 70% respectively). In ME/CFS patients, 61% of N1 stage was higher and 57% of REM was lower. Arousal index was impaired in 22% of patients.                                                                                                                                                                                    |
| Decker <i>et al.</i> (2009)               | PSG<br>MSLT | Alpha power in the ME/CFS cohort was diminished during stage 2, slow wave, and REM sleep ( $p < 0.0001$ ) compared to HC. Delta power decreased during slow wave sleep ( $p < 0.0001$ ) but was elevated during stage 1 ( $p < 0.0001$ ) and REM ( $p < 0.001$ ). Theta, sigma and beta spectral power during stage 2, slow wave sleep and REM were significantly reduced in patients compared to HCs ( $p < 0.0001$ ).                                           |
| Gotts <i>et al.</i> (2016)                | PSG         | ME/CFS patients showed significantly increased wake after sleep onset ( $p < 0.05$ ), percentage wake ( $p < 0.01$ ) and REM latency ( $p < 0.05$ ) compared to HCs. ME/CFS patients showed more severe symptoms of insomnia compared to HCs ( $p < 0.001$ ). ME/CFS patients showed decreased percentage sleep efficiency index compared to HCs ( $p < 0.05$ ).                                                                                                  |
| Kishi <i>et al.</i> (2008)                | PSG         | REM to non-REM sleep transitions have been detected in humans. The frequency of these transitions was found to be significantly reduced in ME/CFS patients compared to HC ( $p < 0.01$ ). Subsequent alteration of transition patterns also occurs resulting in significantly greater relative transition frequency of moving from both REM and stage I sleep to awake ( $p < 0.01$ ).                                                                            |
| Le bon <i>et al.</i> (2007)               | PSG         | ME/CFS patients had significantly lower sleep period time ( $p < 0.017$ ), total sleep time ( $p < 0.009$ ), sleep efficiency index ( $p < 0.013$ ), movement time ( $p < 0.001$ ) and REM sleep latency ( $p < 0.055$ ) and higher sleep onset latency ( $p < 0.0001$ ) compared to ME/CFS patients.                                                                                                                                                             |
| Le Bon <i>et al.</i> (2012)               | PSG         | The ultra-slow delta power was approximately one fifth lower in ME/CFS patients compared to HCs in N3 sleep ( $p = 0.046$ ). Theta, alpha, sigma and beta did not differ significantly between the two groups. ME/CFS patients had significantly higher MAI ( $p = 0.031$ ) and N3 sleep % ( $p = 0.026$ ) compared to HCs.                                                                                                                                       |
| Majer (2007)                              | PSG<br>MSLT | There were no significant differences found in sleep pathology or architecture parameters measured using MSLT and PSG in ME/CFS patients compared to HCs.                                                                                                                                                                                                                                                                                                         |

|                 |             |                                                                                                                                                                                                                                                                                                                                                                                                                                                                                                                                                                                                   |
|-----------------|-------------|---------------------------------------------------------------------------------------------------------------------------------------------------------------------------------------------------------------------------------------------------------------------------------------------------------------------------------------------------------------------------------------------------------------------------------------------------------------------------------------------------------------------------------------------------------------------------------------------------|
| Neu (2007)      | PSG         | Only two objective sleep parameters the MAI ( $p<0.001$ ) and AHI per hour ( $p<0.095$ ) were significantly higher in ME/CFS patients compared to HCs.                                                                                                                                                                                                                                                                                                                                                                                                                                            |
| Neu (2008)      | PSG<br>MSLT | ME/CFS patients showed significantly increased sleep onset latency ( $p=0.042$ ), AHI per hour of sleep ( $p<0.0001$ ) and micro arousal index hour of sleep ( $p<0.0001$ ) compared to HCs. ME/CFS patients showed significantly decreased scores on the MSLT ( $p<0.005$ ) compared to HCs.                                                                                                                                                                                                                                                                                                     |
| Neu (2014A)     | PSG         | ME/CFS patients showed significantly increased WASO ( $p=0.033$ ), SWS ( $p=0.015$ ), MAI ( $p<0.0001$ ), AHI ( $p<0.001$ ) and periodic limb movement ( $p=0.035$ ) compared to HCs.                                                                                                                                                                                                                                                                                                                                                                                                             |
| Neu (2014B)     | PSG<br>MSLT | ME/CFS patients had significantly longer SWS duration as well as higher periodic limb movements and AHI ( $p<0.001$ ). No significant difference between patient and HC groups were found in MSLT sleep latencies, sleep period time, total sleep time, non-REM stages N1 and N2, REM latency and duration, and sleep efficiency.                                                                                                                                                                                                                                                                 |
| Neu (2015)      | PSG         | ME/CFS patients had significantly greater SWS ( $p=0.024$ ) and MAI ( $p<0.001$ ) scores compared to HC. There was a significant decrease in central ultra-slow power (0.3-0.79Hz) in the patient group ( $p<0.001$ ).                                                                                                                                                                                                                                                                                                                                                                            |
| Reeves (2006)   | PSG<br>MSLT | There were no differences of clinical significance in frequency of obstructive sleep apnoea per hour in ME/CFS patients. There were also no significant differences in sleep architecture characteristics in ME/CFS patients compared to HCs.                                                                                                                                                                                                                                                                                                                                                     |
| Sharpley (1997) | PSG         | There were no significant differences found in sleep characteristics between ME/CFS patients and HC. There was, however, a significant decrease in sleep efficiency ( $p<0.05$ ) and increase in time spent in bed ( $p<0.05$ ) and total wake time after start of sleep ( $p<0.05$ ) in ME/CFS patients compared to HC.                                                                                                                                                                                                                                                                          |
| Togo (2008)     | PSG         | ME/CFS patients had significantly different PSG recordings and subjective experiences compared to HC ( $p<0.05$ ). Differences also include less total sleep time ( $p<0.05$ ), lower sleep efficiency ( $p<0.05$ ) and less rapid eye movement in the ME/CFS patient group ( $p<0.05$ ). ME/CFS patients were stratified into a.m. sleepier and a.m. less sleepy groups. ME/CFS patients that were in the a.m. sleepier group had reduced length of uninterrupted sleep ( $p<0.05$ ).                                                                                                            |
| Togo (2013)     | PSG         | Although PSG results are not significantly different between ME/CFS patients and HC, patients reporting more sleepiness in the morning showed significantly higher ( $p<0.05$ ) fractal scaling index alpha 1 during stages 1, 2 and 3 sleep. In patients, there was a correlation between self-reported sleepiness and fractal scaling index alpha 1 during non-REM sleep ( $\sim r=0.51$ , $p<0.05$ ). Fractal scaling index alpha 1 was significantly lower when asleep for HC and patients in the less sleepy group ( $p<0.05$ ), however, these values did not change in the sleepier group. |
| Watson (2003)   | PSG         | ME/CFS patients presented with eight subjective measures of insomnia and low-quality sleep ( $p\leq 0.05$ ). Percent stage REM sleep was higher in the ME/CFS twin compared to the healthy twin ( $p\leq 0.05$ ). Other objective measures including sleep latency, total sleep time, sleep efficiency, arousal number, arousal index, hypnogram awakenings, REM- sleep latency did not significantly differ between the two groups.                                                                                                                                                              |
| Watson (2004)   | PSG<br>MSLT | There were no significant differences found between the two groups in mean sleep latency on the MSLT.                                                                                                                                                                                                                                                                                                                                                                                                                                                                                             |

Abbreviations: AHI, apnoea- hypopnea index; HC, healthy controls; ME/CFS, Myalgic Encephalomyelitis/ Chronic Fatigue Syndrome; MAI, Micro-arousal index; MSLT, Multiple Sleep Latency Testing; PSG, Polysomnography; REM, Rapid Eye Movement; SWS, Slow Wave Sleep
