# Supplementary material for: Systematic Review of Sleep Characteristics in Myalgic Encephalomyelitis/Chronic Fatigue Syndrome
Source: MDPI journal article supplement (doi:10.3390/healthcare9050568), 2021-05-11
Supplement: s1 [file s1]

**Table S4.** Summary of secondary outcome measures

|                          | Secondary outcome measure (s)                                                                                                                                                                                             | Results                                                                                                                                                                                                                                                                                                     |
|--------------------------|---------------------------------------------------------------------------------------------------------------------------------------------------------------------------------------------------------------------------|-------------------------------------------------------------------------------------------------------------------------------------------------------------------------------------------------------------------------------------------------------------------------------------------------------------|
| Armitage et al (2009)    | N/A                                                                                                                                                                                                                       | N/A                                                                                                                                                                                                                                                                                                         |
| Ball et al (2004)        | N/A                                                                                                                                                                                                                       | N/A                                                                                                                                                                                                                                                                                                         |
| Bileviciute et al (2020) | TAS-20 DIF<br>TAS-20 DDF<br>TAS-20 EOT<br>TAS-20 EOT<br>TAS Total<br>LEAS-Self<br>LEAS-Other<br>LEAS-Total<br>HADS-D<br>HADS-A                                                                                            | TAS-20 DIF: p <0.001<br>TAS-20 DDF: NS<br>TAS-20 EOT: NS<br>TAS-20 EOT: NS<br>TAS Total: p <0.05<br>LEAS-Self: p <0.01<br>LEAS-Other: NS<br>LEAS-Total: NS<br>HADS-D: p <0.001<br>HADS-A: NS                                                                                                                |
| Decker et al (2009)      | N/A                                                                                                                                                                                                                       | N/A                                                                                                                                                                                                                                                                                                         |
| Fischler et al (1997)    | N/A                                                                                                                                                                                                                       | N/A                                                                                                                                                                                                                                                                                                         |
| Gotts et al (2016)       | PSQI subjective sleep quality<br>PSQI sleep latency<br>PSQI sleep duration<br>PSQI habitual sleep efficiency<br>PSQI sleep disturbances<br>PSQI use of sleep medication<br>PSQI daytime dysfunction<br>PSQI global<br>ISI | PSQI subjective sleep quality: p <0.001<br>PSQI sleep latency: p <0.001<br>PSQI sleep duration: p <0.05<br>PSQI habitual sleep efficiency: p <0.05<br>PSQI sleep disturbances: p <0.001<br>PSQI use of sleep medication: NS<br>PSQI daytime dysfunction: p < 0.01<br>PSQI global: p <0.001<br>ISI: p <0.001 |
| Kishi et al (2008)       | N/A                                                                                                                                                                                                                       | N/A                                                                                                                                                                                                                                                                                                         |
| Le Bon et al (2007)      | N/A                                                                                                                                                                                                                       | N/A                                                                                                                                                                                                                                                                                                         |
| Le Bon et al (2012)      | PSQI<br>FSS<br>ESS                                                                                                                                                                                                        | PSQI: p <0.001<br>FSS: p <0.001<br>ESS: 0.010                                                                                                                                                                                                                                                               |
| Majer et al (2007)       | Insomnia<br>Sleepiness<br>Physical/ somatic<br>Apnea<br>Body clock<br>Nasal obstruction                                                                                                                                   | Insomnia: p <0.001<br>Sleepiness: p = 0.060<br>Physical/ somatic: p = 0.001<br>Apnea: p = 0.865<br>Body clock: 0.610<br>Nasal obstruction: 0.318                                                                                                                                                            |
| Neu et al (2007)         | PSQI global score<br>Sleep quality<br>Sleep latency<br>Sleep duration<br>Sleep efficiency<br>Sleep disturbance<br>Use of medication<br>Daytime dysfunction<br>FSS mean score<br>HAMA<br>HAM-D_21<br>BDI-13                | PSQI global score: p < 0.01<br>Sleep quality: p < 0.01<br>Sleep duration: NS<br>Sleep efficiency: p = 0.017<br>Sleep disturbance: p = 0.004<br>Use of medication: NS<br>Daytime dysfunction: p < 0.01<br>FSS mean score: p < 0.01<br>HAMA: p < 0.01<br>HAM-D_21: p < 0.01<br>BDI-13: p < 0.01               |
| Neu et al (2008)         | ESS<br>FSS                                                                                                                                                                                                                | ESS: p <0.001<br>FSS: p <0.001                                                                                                                                                                                                                                                                              |

|                          |                                                                                                                                                                                                                                          |                                                                                                                                                                                                                                                                                          |
|--------------------------|------------------------------------------------------------------------------------------------------------------------------------------------------------------------------------------------------------------------------------------|------------------------------------------------------------------------------------------------------------------------------------------------------------------------------------------------------------------------------------------------------------------------------------------|
|                          | BDI<br>HAMA                                                                                                                                                                                                                              | BDI: p <0.001<br>HAMA: p <0.001                                                                                                                                                                                                                                                          |
| Neu et al<br>(2014A)     | PSQI<br>ESS<br>FSS<br>HAD-A<br>HAD-D                                                                                                                                                                                                     | PSQI: p < 0.001<br>ESS: p < 0.001<br>FSS: p < 0.001<br>HAD-A: p < 0.001<br>HAD-D: p < 0.001                                                                                                                                                                                              |
| Neu et al<br>(2014B)     | HAD-A<br>HAD-D<br>VAS-F<br>VAS-S<br>PSQI<br>FSS<br>ESS                                                                                                                                                                                   | HAD-A: p = 0.009<br>HAD-D: p = 0.001<br>VAS-F: p < 0.001<br>VAS-S: NS<br>PSQI: p < 0.001<br>FSS: p < 0.001<br>ESS: p < 0.006                                                                                                                                                             |
| Neu et al (2015)         | HAD-A<br>HAD-D<br>HAD- Total<br>ESS<br>FSS<br>PSQI                                                                                                                                                                                       | HAD-A: p = 0.001<br>HAD-D: p < 0.001<br>HAD- Total: p < 0.001<br>ESS: 0.593<br>FSS: p < 0.001<br>PSQI: p < 0.001                                                                                                                                                                         |
| Reeves et al<br>(2006)   | N/A                                                                                                                                                                                                                                      | N/A                                                                                                                                                                                                                                                                                      |
| Sharpley et al<br>(1997) | HAD-A<br>HAD-D<br>BDI-D<br>SF-36<br>FSS                                                                                                                                                                                                  | N/A                                                                                                                                                                                                                                                                                      |
| Togo et al<br>(2008)     | CES-D<br><b>Likert scale</b><br><b>Sleepiness:</b><br>Evening<br>Morning<br><b>Fatigue:</b><br>Evening<br>Morning<br><b>Pain:</b><br>Evening<br>Morning<br><b>Feeling blue</b><br>Evening<br>Morning                                     | CES-D: p < 0.05<br><b>Likert scale</b><br><b>Sleepiness:</b><br>Evening: p < 0.05<br>Morning: p < 0.05<br><b>Fatigue:</b><br>Evening: p < 0.05<br>Morning: p < 0.05<br><b>Pain:</b><br>Evening: p < 0.05<br>Morning: p < 0.05<br><b>Feeling blue</b><br>Evening: NS<br>Morning: p < 0.05 |
| Togo et al<br>(2013)     | CES-D<br><b>Sleepiness:</b><br>Evening<br>Morning                                                                                                                                                                                        | CES-D: p < 0.05<br><b>Sleepiness:</b><br>Evening: p < 0.05<br>Morning: p < 0.05                                                                                                                                                                                                          |
| Watson et al<br>(2003)   | SSS<br>ESS                                                                                                                                                                                                                               | SSS: p <0.001<br>ESS: p < .05                                                                                                                                                                                                                                                            |
| Watson et al<br>(2004)   | I wake up often during the night;<br>My nights sleep is often restless<br>and disturbed;<br>I feel that my sleep is abnormal;<br>I have trouble getting to sleep at<br>night;<br>I have been unable to sleep at all<br>for several days; | I wake up often during the night: p ≤0.001<br>My nights sleep is often restless and<br>disturbed: p ≤0.001<br>I feel that my sleep is abnormal: p ≤0.001<br>I have trouble getting to sleep at night: p<br>≤0.001<br>I have been unable to sleep at all for several<br>days: p ≤0.05     |

|  |                                                                                                                      |                                                                                                                                                                  |
|--|----------------------------------------------------------------------------------------------------------------------|------------------------------------------------------------------------------------------------------------------------------------------------------------------|
|  | I feel that I have insomnia;<br>I often have a poor nights sleep;<br>I take a prescription drug to help<br>me sleep. | I feel that I have insomnia: $p \leq 0.01$<br>I often have a poor nights sleep: $p \leq 0.001$<br>I take a prescription drug to help me sleep:<br>$p \leq 0.001$ |
|--|----------------------------------------------------------------------------------------------------------------------|------------------------------------------------------------------------------------------------------------------------------------------------------------------|

Abbreviations: CES-D, Center for Epidemiological Studies- Depression; ESS, Epworth Sleepiness Scale, FSS, HADS, Hospital Anxiety and Depression Scale; HADS-A, Hospital Anxiety and Depression Scale Anxiety; HADS-D, Hospital Anxiety and Depression Scale Depression; HAMA, Hamilton Anxiety Rating Scale; ISI, Insomnia Severity Index; LEAS, Levels of Emotional Awareness Scale; TAS, Toronto Alexithymia Scale; PSQI, Pittsburgh Sleep Quality Index; VAS-F, Visual Analogue Scale- Fatigue; VAS-S, Visual Analogue Scale- sleep;
