# Supplementary material for: Systematic Review of Sleep Characteristics in Myalgic Encephalomyelitis/Chronic Fatigue Syndrome
Source: Healthcare (Basel). 2021 May 11;9(5):568. doi: 10.3390/healthcare9050568 (PMC8150292; doi:10.3390/healthcare9050568)
Supplement: Supplementary file 1 [file healthcare-09-00568-s001.zip]

Archive with 5 entries (5 files):
- Supplementary Files/File S1. JBI CACCCS and justification.pdf
- Supplementary Files/Table S1. Search code.pdf
- Supplementary Files/Table S2. Study and Patient Characteristics.pdf
- Supplementary Files/Table S3. Summary of primary outcome measures.pdf
- Supplementary Files/Table S4. Summary of secondary outcome measures.pdf
